# Supplementary material for: HOXA5 plays tissue-specific roles in the developing respiratory system
Source: Oxford University Press journal article supplement (doi:10.1242/dev.152686), 2017-08-21
Supplement: dev152686supp.pdf [file dev152686supp.pdf]

SUPPLEMENTAL DATA

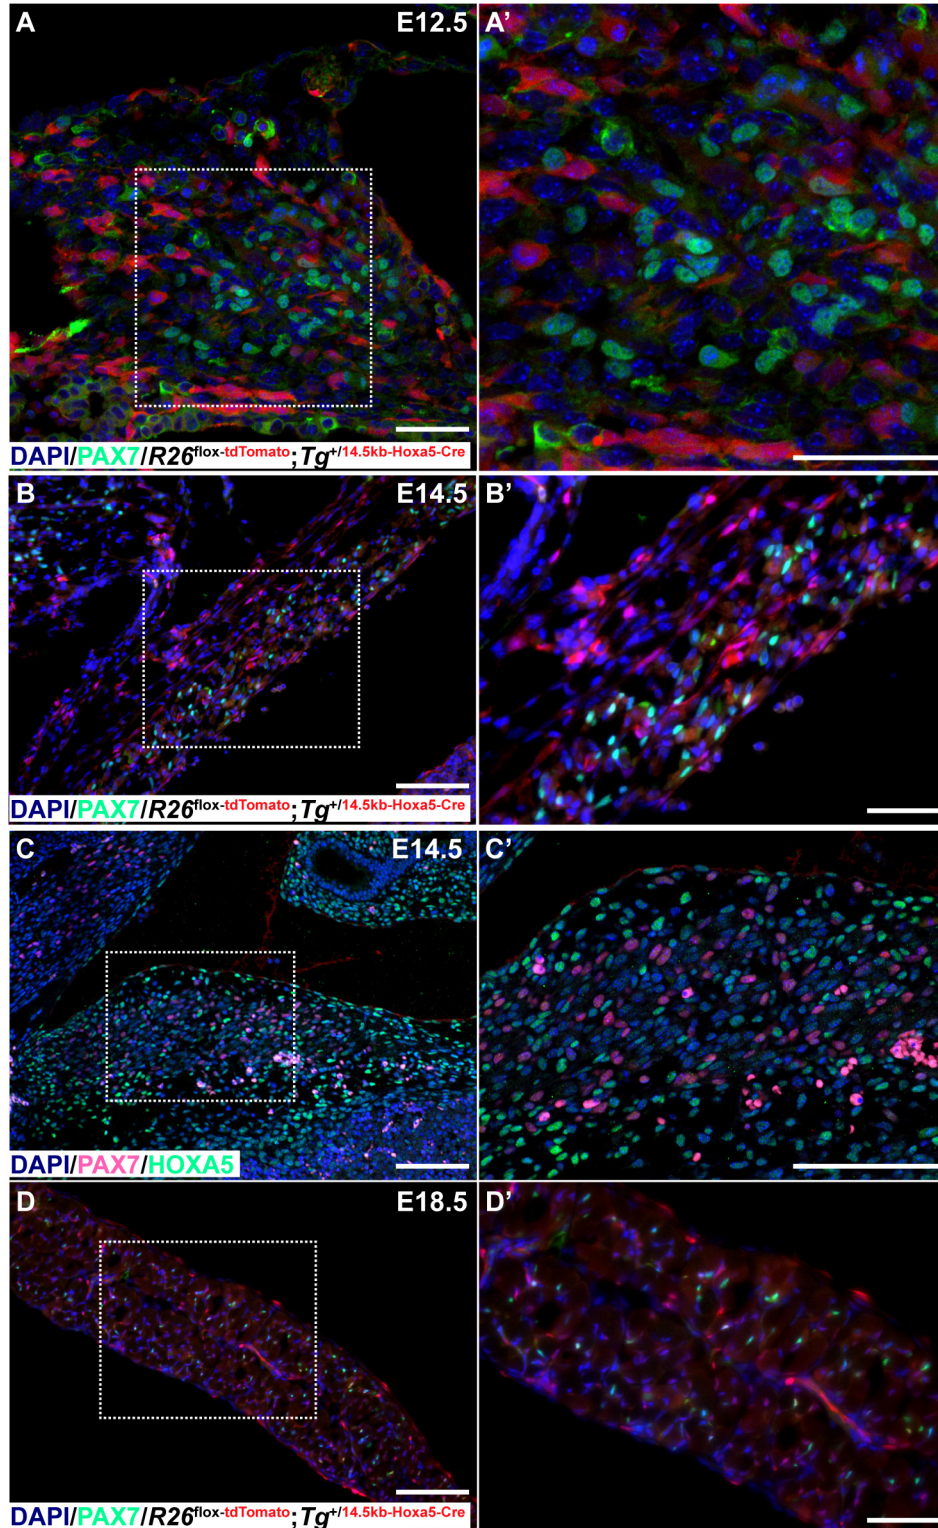

Figure S1

**Figure S1. *Hoxa5* is not expressed in muscle cells of the diaphragm.** PAX7 immunostaining was performed on sections of the developing diaphragm from E12.5 (A-A'), E14.5 (B-B') and E18.5 (D-D') *R26<sup>mT</sup>;Hoxa5-Cre* embryos. No PAX7 co-staining was observed in *Hoxa5* descendant cells (*R26<sup>mT</sup>*-positive). PAX7 and HOXA5 co-immunolabelling was also performed on diaphragm sections from E14.5 wt embryos and no co-staining was observed (C-C'). Scale bars: 100  $\mu\text{m}$  (B,D), 50  $\mu\text{m}$  (B',C-C',D'), 25  $\mu\text{m}$  (A-A').

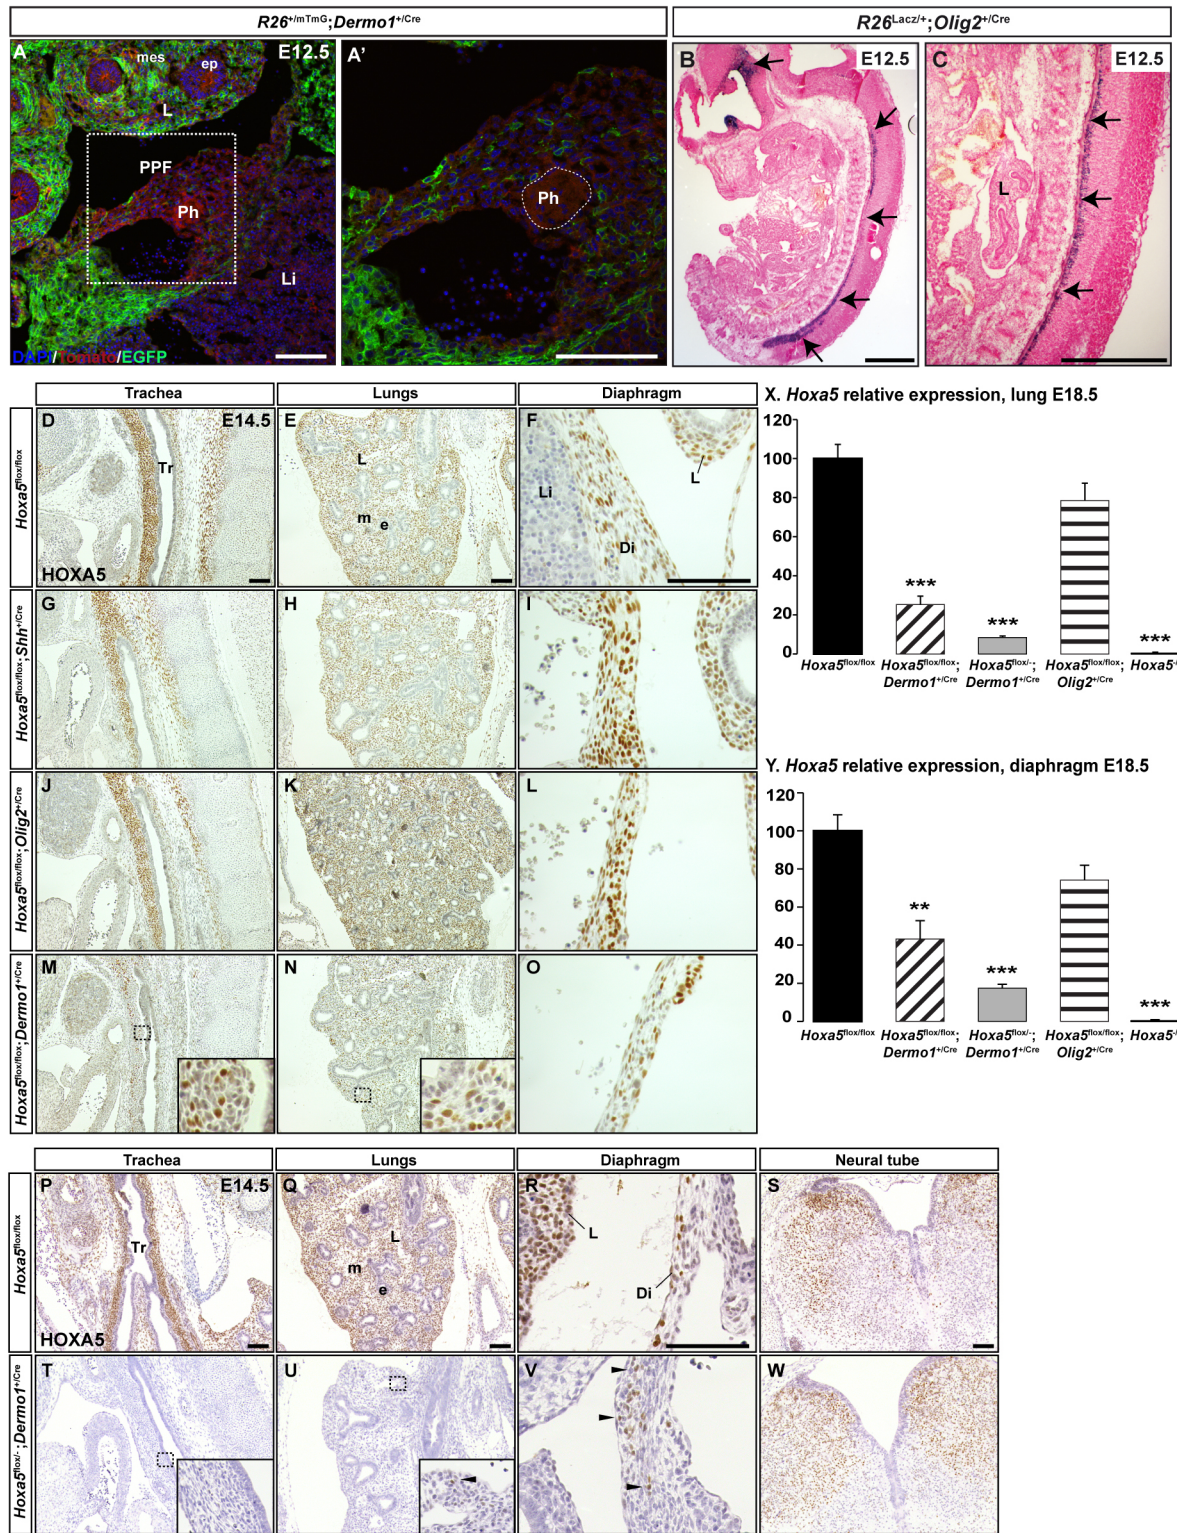

Figure S2

**Figure S2. Cre recombinase specificity and efficiency of the *Hoxa5* deletion by the *Shh*<sup>Cre</sup>, *Dermo1*<sup>Cre</sup> and *Olig2*<sup>Cre</sup> alleles in the developing respiratory system.** Validation of Cre specificity was assessed by breeding *Dermo1*<sup>+Cre</sup> and *Olig2*<sup>+Cre</sup> mice with *R26*<sup>mT/mG</sup> and *R26*<sup>+LacZ</sup> reporter mice, respectively. *Dermo1*Cre activity was assayed by GFP visualization on sections of E12.5 *R26*<sup>mT/mG</sup>;*Dermo1*<sup>+Cre</sup> embryos (A-A'). *Olig2*Cre activity was monitored by  $\beta$ -galactosidase staining in sections of E12.5 *R26*<sup>+LacZ</sup>;*Olig2*<sup>+Cre</sup> embryos (B,C). Efficiency of the *Hoxa5* deletion with the *Shh*<sup>Cre</sup>, *Dermo1*<sup>Cre</sup> and *Olig2*<sup>Cre</sup> alleles in the developing trachea, lung and diaphragm was tested by IHC at E14.5 (D-W). As expected, HOXA5 mesenchymal expression was not affected by *Shh*Cre and *Olig2*Cre recombinases (G-L), whereas the efficiency of the *Dermo1*Cre was incomplete and residual HOXA5 expression remained (M-O, P-W). Efficiency of the *Hoxa5* deletion in lung and diaphragm was also monitored by qRT-PCR at E18.5 (X-Y). A significant 75% and 57% reduction was observed in *Hoxa5*<sup>flx/flx</sup>;*Dermo1*<sup>+Cre</sup> lung and diaphragm, respectively. The reduction was more important in *Hoxa5*<sup>flx/-</sup>;*Dermo1*<sup>+Cre</sup> specimens. No significant variation was seen in E18.5 *Hoxa5*<sup>flx/flx</sup>;*Olig2*<sup>+Cre</sup> lungs and diaphragm but a complete loss of *Hoxa5* expression was measured in *Hoxa5*<sup>-/-</sup> specimens. Di, diaphragm; ep, epithelium; L, lungs; Li, liver; mes, mesenchyme; Ph, phrenic nerve; Tr, trachea. Scale bars: 1 mm (B,C), 100  $\mu$ m (D-W), 50  $\mu$ m (A-A').

A. Ratio of genotypes of offspring from  $Hoxa5^{flox/+};Shh^{+/Cre}$  x  $Hoxa5^{flox/flox}$

| Age        | # of litters | # of animals | $Shh^{+/+}$      |                     | $Shh^{+/Cre}$    |                     |
|------------|--------------|--------------|------------------|---------------------|------------------|---------------------|
|            |              |              | $Hoxa5^{flox/+}$ | $Hoxa5^{flox/flox}$ | $Hoxa5^{flox/+}$ | $Hoxa5^{flox/flox}$ |
| E18.5      | 9            | 59 (100%)    | 12 (21%)         | 15 (25%)            | 15 (25%)         | 17 (29%)            |
| P30        | 7            | 47 (100%)    | 10 (21%)         | 17 (36%)            | 7 (15%)          | 13 (28%)            |
| % Expected |              |              | 25%              | 25%                 | 25%              | 25%                 |

B. Lung Weight / Body Weight ratio, E18.5

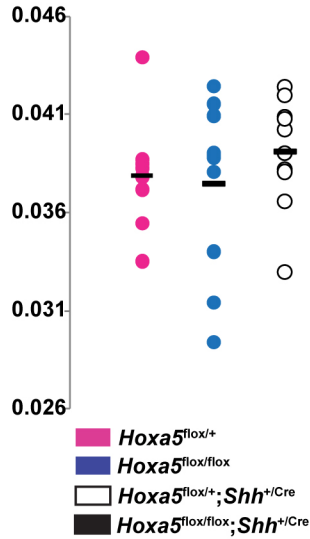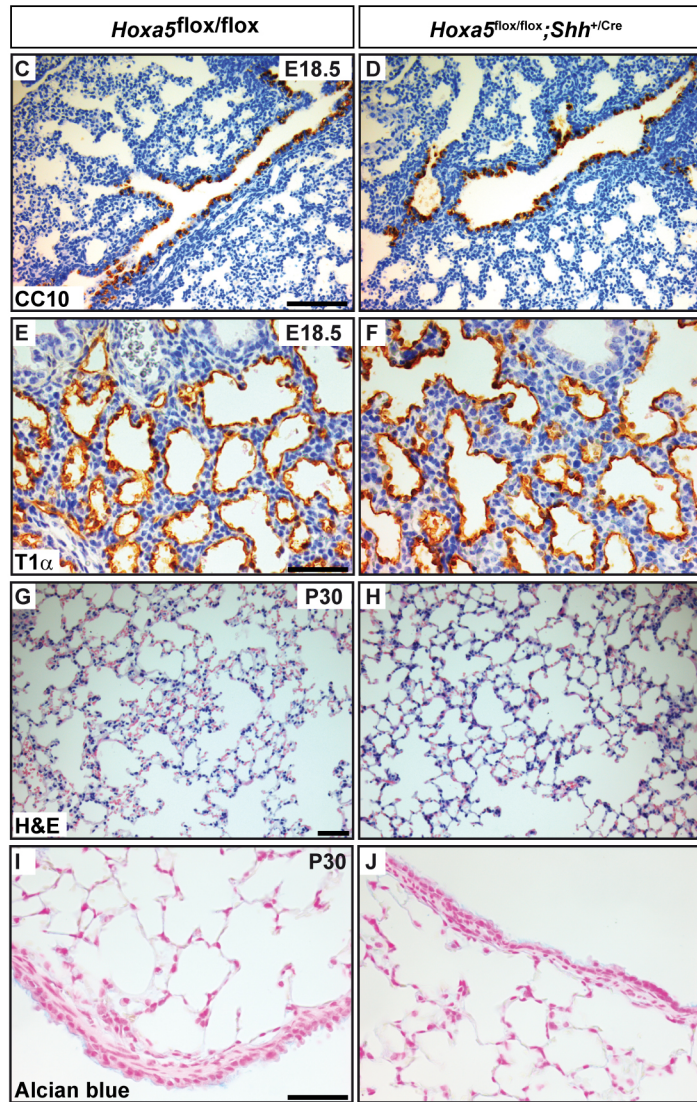

Figure S3

**Figure S3. No lung phenotype is caused by the epithelial *Hoxa5* inactivation.** Expected mendelian ratios of genotypes of offspring resulting from breeding of *Hoxa5*<sup>flox/flox</sup> with *Hoxa5*<sup>flox/+</sup>;*Shh*<sup>+cre</sup> mice (A). No change was observed for the LW/BW ratio between *Hoxa5*<sup>flox/flox</sup>;*Shh*<sup>+cre</sup> embryos and controls at E18.5 (B). No abnormal epithelial cell differentiation of club cells and type I pneumocytes was seen along the respiratory tract of E18.5 *Hoxa5*<sup>flox/flox</sup>;*Shh*<sup>+cre</sup> embryos, as assessed by immunostaining for CC10 and T1a, respectively (C-F). Alveolar surface density was normal and no goblet cell metaplasia was detected in lungs from *Hoxa5*<sup>flox/flox</sup>;*Shh*<sup>+cre</sup> adults (G-J). These data reflected the lack of *Hoxa5* cell-autonomous function in lung epithelium. Scale bars: 100  $\mu$ m (C,D,G,H), 50  $\mu$ m (E,F,I,J).

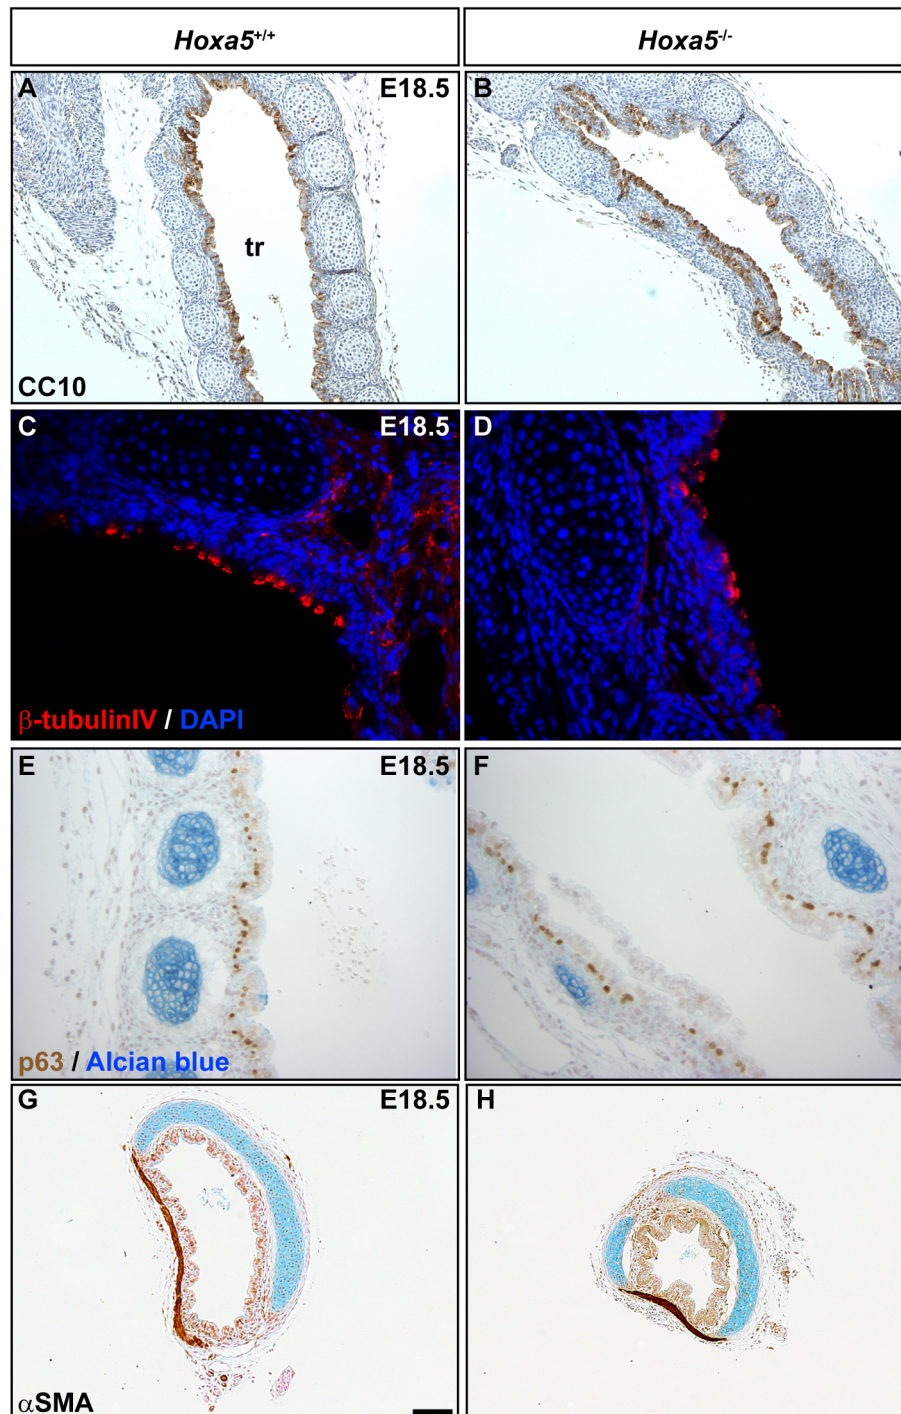

Figure S4

**Figure S4. Tracheal smooth muscle formation and epithelial differentiation are unchanged in *Hoxa5*<sup>-/-</sup> embryos.** No quantitative and qualitative variation in club, ciliated, basal, goblet and smooth muscle cells was observed in E18.5 *Hoxa5*<sup>-/-</sup> tracheas, as assessed by immuno- and histological stainings for CC10, β-tubulinIV, p63, Alcian blue and αSMA, respectively (A-H).

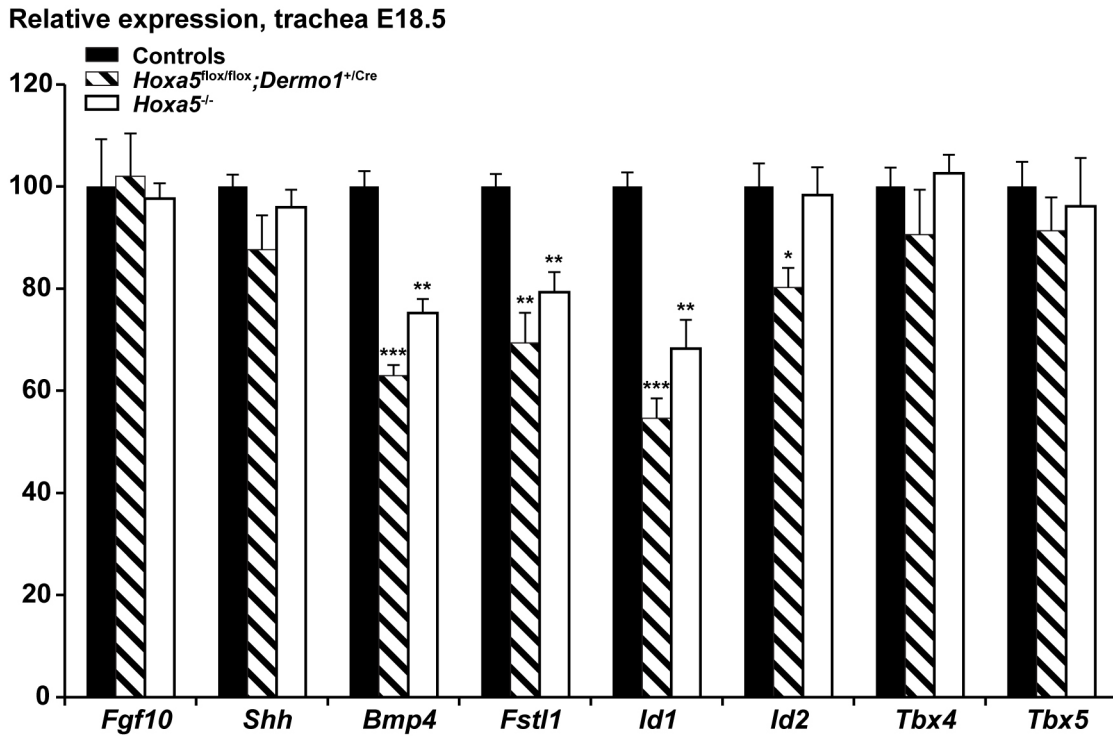

Figure S5

**Figure S5. Impact of the loss of *Hoxa5* function on the expression of regulators of tracheal cartilage formation.** qRT-PCR analysis of *Fgf10*, *Shh*, *Bmp4*, *Fstl1*, *Id1*, *Id2*, *Tbx4* and *Tbx5* expression levels in tracheas from E18.5 wt, *Hoxa5*<sup>flox/flox</sup>; *Dermo1*<sup>+Cre</sup> and *Hoxa5*<sup>-/-</sup> embryos.



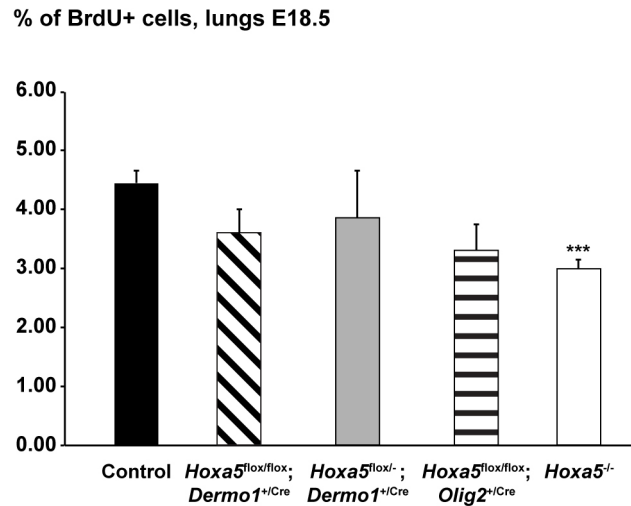

**Figure S6**

**Figure S6. *Hoxa5* mesenchymal and motor neuron mutations differentially influence proliferation of the developing lung.** Percentage of BrdU+ cells revealed a downward trend in cell proliferation in E18.5 *Hoxa5<sup>flox/flox</sup>;Dermo1<sup>+Cre</sup>*, *Hoxa5<sup>flox/-</sup>;Dermo1<sup>+Cre</sup>* and *Hoxa5<sup>flox/flox</sup>;Olig2<sup>+Cre</sup>* lungs and a significant reduction in *Hoxa5<sup>-/-</sup>* mutants compared to controls.

**A. Relative expression, Lungs E12.5**

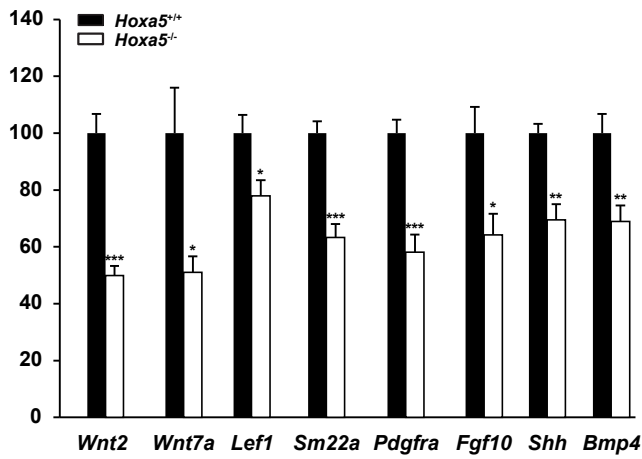

**B. Relative expression, Lungs E18.5**

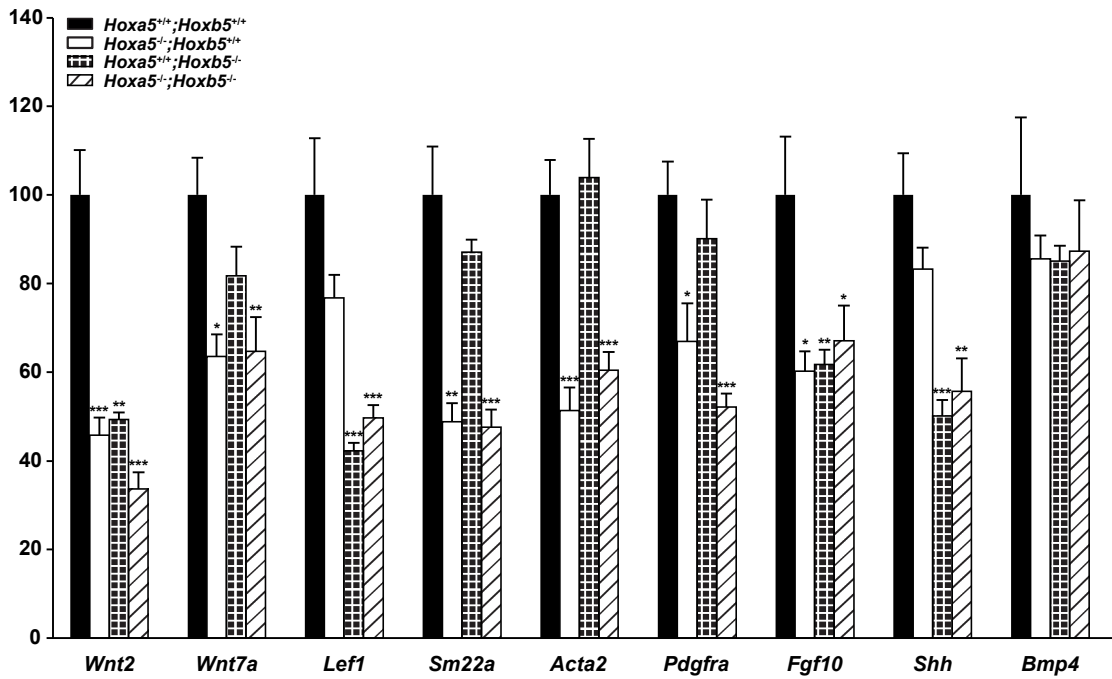

**C. Relative expression, Lungs E18.5**

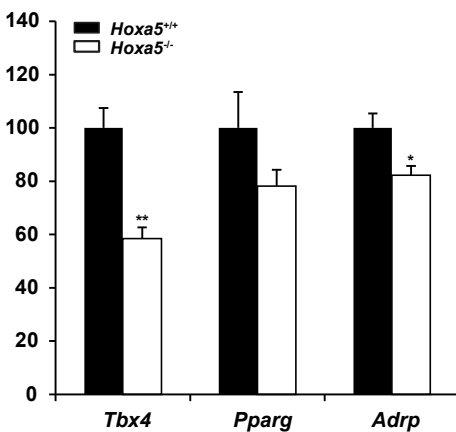

**Figure S7. Specific contribution of *Hoxa5* in the control of lung signaling pathways.** Expression levels of *Wnt2*, *Wnt7a*, *Lef1*, *Sm22a*, *Pdgfra*, *Fgf10*, *Shh* and *Bmp4* genes in lungs from E12.5 wt and *Hoxa5*<sup>-/-</sup> embryos (A). All these genes showed a significantly decreased expression in *Hoxa5*<sup>-/-</sup> lungs. Expression levels of *Wnt2*, *Wnt7a*, *Lef1*, *Sm22a*, *aSma*, *Pdgfra*, *Fgf10*, *Shh* and *Bmp4* genes in lungs from E18.5 wt, *Hoxa5*<sup>-/-</sup>, *Hoxb5*<sup>-/-</sup> and *Hoxa5*<sup>-/-</sup>;*Hoxb5*<sup>-/-</sup> compound mutant embryos (B). *Hoxa5*<sup>-/-</sup> specimens showed significantly reduced expression levels for *Wnt2*, *Wnt7a*, *Sm22a*, *aSma*, *Pdgfra* and *Fgf10* while *Hoxb5*<sup>-/-</sup> specimens showed decreased expression levels for *Wnt2*, *Lef1*, *Fgf10* and *Shh*. In *Hoxa5*<sup>-/-</sup>;*Hoxb5*<sup>-/-</sup> compound mutants, except for *Bmp4*, all genes tested showed a significant reduced expression. Expression levels of *Tbx4*, *Pparg* and *Adrp* genes in lungs from E18.5 wt and *Hoxa5*<sup>-/-</sup> embryos (C). *Tbx4* and *Adrp* genes showed a significantly decreased expression in *Hoxa5*<sup>-/-</sup> lungs, while *Pparg* showed a downward trend.

**Supplementary Table 1. List of primary and secondary antibodies**

| Antigen                                           | Antibody/clone                                 | Reference    | Source                                      | Dilution |
|---------------------------------------------------|------------------------------------------------|--------------|---------------------------------------------|----------|
| AQP5 (Aquaporin 5)                                | rabbit polyclonal                              | Ab78486      | Abcam, Toronto, ON, Canada                  | 1:400    |
| $\alpha$ SMA                                      | rabbit polyclonal                              | Ab5694       | Abcam, Toronto, ON, Canada                  | 1:300    |
| BrdU                                              | mouse monoclonal/<br>clone 131-14871           | MAB4072      | Millipore, Billerica, MA, USA               | 1:1000   |
| $\alpha$ -bungarotoxin, Alexa Fluor 555 conjugate |                                                | B35451       | Invitrogen, Carlsbad, CA, USA               | 1:1000   |
| $\beta$ IV-Tubulin                                | Mouse monoclonal<br>clone ONS1A6               | MU178-UC     | Biogenex, Fremont, CA, USA                  | 1:150    |
| CC10                                              | goat polyclonal                                |              | Gift from Dr. G. Singh, Pittsburg, PA, USA  | 1:400    |
| Collagen Type II                                  | Mouse/clone II-<br>II6B3. Supernatant          |              | Hybridoma Bank, IO, USA                     | 1:75     |
| HOXA5                                             | rabbit polyclonal                              | HPA029319    | Sigma Aldrich, Oakville, ON, Canada         | 1:1000   |
| HOXA5                                             | rabbit polyclonal                              |              | From Dr. J. Dasen, NY, USA                  | 1:10000  |
| $\alpha$ -Laminin                                 | rabbit polyclonal                              | BRL#6265SA   | Gift from Dr. N. Marceau, Qc, Canada        | 1:50     |
| Neurofilament (NF)                                | rabbit polyclonal                              | AB1987       | Millipore, Billerica, MA, USA               | 1:1000   |
| PAX7                                              | mouse monoclonal                               |              | Hybridoma Bank, IO, USA                     | 1:10     |
| p63                                               | mouse monoclonal<br>clone 4A4                  | Sc-8431      | Santa Cruz, Santa Cruz, CA, USA             | 1 :100   |
| RFP (DsRed)                                       | rabbit polyclonal                              | 600-401-379  | Rockland, Limerick, PA, USA                 | 1: 200   |
| SOX9                                              | rabbit polyclonal                              | sc-20095     | Santa Cruz, Santa Cruz, CA, USA             | 1:100    |
| Synaptophysin (SYN)                               | rabbit polyclonal                              | 08-0130      | Invitrogen, Carlsbad, CA, USA               | 1:5      |
| T1 $\alpha$                                       | syrian-hamster/<br>clone 8.1.1.<br>Supernatant |              | Hybridoma Bank, IO, USA                     | 1:75     |
| Biotinylated goat anti-rabbit                     |                                                | BA-1000      | Vector Laboratories, Burlington, ON, Canada | 1:250    |
| Biotinylated swine anti-goat                      |                                                | CLCC50015    | Cedarlane, Burlington, ON, Canada           | 1:250    |
| Biotinylated goat anti-syrian hamster             |                                                | 107-065-142  | Cedarlane, Burlington, ON, Canada           | 1:250    |
| Biotinylated goat anti-mouse                      |                                                | 115-065-003  | Cedarlane, Burlington, ON, Canada           | 1:500    |
| Donkey anti-rabbit, Alexa Fluor 488 conjugate     |                                                | A-21206      | Invitrogen, Carlsbad, CA, USA               | 1:1000   |
| Goat anti-mouse, Alexa Fluor 647 conjugate        |                                                | A-21236      | Invitrogen, Carlsbad, CA, USA               | 1:500    |
| Goat anti-rabbit, Alexa Fluor 488 conjugate       |                                                | A11008       | Molecular Probes, Eugene, OR, USA           | 1:250    |
| TSA Cyanine 3 Plus Evaluation Kit                 |                                                | NEL744E001KT | PerkinElmer, MA, USA                        | 1:50     |

**Supplementary Table 2. List of primer sequences**

| Gene                 | Sequence (5'-3')                                              | Fragment size (bp) |
|----------------------|---------------------------------------------------------------|--------------------|
| <i>Acta2 (aSma)</i>  | F-ACAGCTATGTGGGGGATGAA<br>R-GTTGGCCTTAGGGTTCAGTG              | 194                |
| <i>Adrp (Plin2)</i>  | F-GTCCCTCAGCTCTCCTGTTA<br>R-ATAAGCGGAGGACACAAGGT              | 146                |
| <i>Bmp4</i>          | F-AGCGTCCC GCCAGCCGA<br>R-CGGAGCTCTGCCGAGGAG                  | 148                |
| <i>Col2a1</i>        | F-TGGGAATGTCCTCTGCGATG<br>R-TGCCCTTTGGCCCTAATTT               | 135                |
| <i>Fgf10</i>         | F- TCAAAGCCATCAACAGCAACTATT<br>R-CTCTTTTCAGCTTACAGTCGTTGTTAAA | 95                 |
| <i>Fstl1</i>         | F-ATGGCGACTCTCACCTGGAC<br>R-CAATGAGGGCGTCAACACAG              | 135                |
| <i>Hoxa5</i>         | F- CCCAGATCTACCCCTGGATG<br>R- GGCATGAGCTATTTTCGATCCT          | 173                |
| <i>Igf2</i>          | F- CCGTACTTCCGGACGACTT<br>R- ATCAGGGGACGATGACGTTT             | 181                |
| <i>Id1</i>           | F-CATGAACGGCTGCTACTCAC<br>R-GAACACATGCCGCCTCG                 | 236                |
| <i>Id2</i>           | F-CCTGCATCACCAGAGACCTG<br>R-GGGAATTCAGATGCCTGCAA              | 102                |
| <i>Lef1</i>          | F-AAATGGGTCCCTTTCTCCAC<br>R-CTCGTCGCTGTAGGTGATGA              | 107                |
| <i>Myf5</i>          | F- CCCACCTCCAACCTGCTCT<br>R- GCAATCCAAGCTGGACACG              | 144                |
| <i>Myf6 (Mrf4)</i>   | F- ACCCTACAGCTACAAACCC<br>R- TGCTCCTCCTTCCTTAGCAG             | 131                |
| <i>Myh1</i>          | F- CCGAAGGCGGAACACTACTGTAA<br>R- CAGGCTGCATAACGCTCTTT         | 148                |
| <i>Myh2</i>          | F- CAGTGTCTAAGGGCCAAGGGA<br>R- GCCTGGAAAATTCACCGGAT           | 159                |
| <i>Myh3</i>          | F- TTCGCTACAACAGATGCGGA<br>R- CTGGGGTCTTGGTTTCGTTG            | 175                |
| <i>Myh4</i>          | F- TGCTTACGTCAGTCAAGGTGAA<br>R- CATCTGCACTGAATCCAGG           | 104                |
| <i>Myh7</i>          | F- GGTGGATGATCTGGAGGGAT<br>R- GAGTGCATTTAACTCAAAGTCCTTC       | 181                |
| <i>Myh8</i>          | F- TGAGGAGGCTGAGGAACAATC<br>R- TTA CTCTGCGCTGATTTTGGT         | 160                |
| <i>Myod1 (Myod)</i>  | F- GCTCTGATGGCATGATGGATTA<br>R- TGGAGATGCGCTCCACTATG          | 165                |
| <i>Myog</i>          | F- GCCATCCAGTACATTGAGCG<br>R- GTGGGAGTTGCATTCACTGG            | 123                |
| <i>Pax3</i>          | F- GGCGGCAGCAAACCC<br>R- AGGGCACAGTGTTCCGAT                   | 145                |
| <i>Pax7</i>          | F- ATTAGCCGAGTGCTCAGAATCA<br>R- CCCTCATCCAGACGGTTCC           | 140                |
| <i>Pdgfra</i>        | F- CCATGCAGTTGCCTTACGACT<br>R- AGAGCCTGCTTTTCACTAGACC         | 193                |
| <i>Runx1</i>         | F- ATGGCAGGCAACGATGAAAA<br>R- AGACGGTGATGGTCAGAGTG            | 142                |
| <i>Pparg</i>         | F-GCCGAGTCTGTGGGGATAAAA<br>R-AGGCACTTCTGAAACCGACA             | 181                |
| <i>Shh</i>           | F-TGACTCAGAGGTGCAAAGACA<br>R-ACTCCTCTGAATGATGGCCG             | 120                |
| <i>Sox5</i>          | F-CACCCTGAAGCAGAGGAAGA<br>R-GGCTCTCAGGAGTCCCTTTT              | 152                |
| <i>Sox6</i>          | F-AATTCTTCAGGCCTTCCCTGAC<br>R-CTTAGCCGGGCTGTCTTC              | 219                |
| <i>Sox9</i>          | F-GTCGGTGAAGAACGGACAAG<br>R-CTGAGATTGCCAGAGTGCT               | 157                |
| <i>Tagln (Sm22a)</i> | F-TGGCTGAAGAATGGTGTGATTC<br>R-TTGAGCCACCTGTTCCATCT            | 126                |
| <i>Tbx4</i>          | F-TCCTACCAGAACCACAAGATCAC<br>R-CCCATTCTCATACTGGTAGTGC         | 240                |
| <i>Tbx5</i>          | F-CCGGAGACAGCTTTTATCGC<br>R-ACTCTTTACTTTGCATCCGAGAC           | 145                |
| <i>Wnt2</i>          | F-TGATGTAGACGCAAGGGGG<br>R-GCCACCTGTAGCTCTCATGTA              | 129                |
| <i>Wnt7a</i>         | F-CACAATAACGAGGCGGGTC<br>R-TCCAGCACGTCTTAGTGTA                | 100                |
